# Supplementary material for: New Insights into the Lactic Acid Resistance Determinants of Listeria monocytogenes Based on Transposon Sequencing and Transcriptome Sequencing Analyses
Source: PubMed Central journal article supplement (PMC9927151; doi:10.1128/spectrum.02750-22), 2022-12-21
Supplement: reviewer-comments.pdf [file reviewer-comments.pdf]

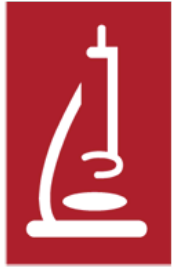

AMERICAN  
SOCIETY FOR  
MICROBIOLOGY

# Microbiology Spectrum

## New insights into the lactic acid resistance determinants of *Listeria monocytogenes* based on Tn-seq and RNA-Seq analyses

Xiayu Liu, Xinxin Pang, Yansha Wu, Yajing Wu, Linan Xu, Qihe Chen, Jianrui Niu, and Xinglin Zhang

Corresponding Author(s): Xinglin Zhang, Linyi University

---

### Review Timeline:

|                     |                   |
|---------------------|-------------------|
| Submission Date:    | July 18, 2022     |
| Editorial Decision: | October 26, 2022  |
| Revision Received:  | November 8, 2022  |
| Accepted:           | November 15, 2022 |

---

Editor: Luxin Wang

Reviewer(s): Disclosure of reviewer identity is with reference to reviewer comments included in decision letter(s). The following individuals involved in review of your submission have agreed to reveal their identity: Augustine Kwaku Agyekum (Reviewer #1)

### Transaction Report:

(Note: With the exception of the correction of typographical or spelling errors that could be a source of ambiguity, letters and reports are not edited. The original formatting of letters and referee reports may not be reflected in this compilation.)

DOI: <https://doi.org/10.1128/spectrum.02750-22>

October 26, 2022

Prof. Xinglin Zhang  
Zhejiang University  
Yuhangtang Rd.866  
hangzhou  
China

Re: Spectrum02750-22 (New insights into the lactic acid resistance determinants of *Listeria monocytogenes* based on Tn-seq and RNA-Seq analyses)

Dear Prof. Xinglin Zhang:

Thank you for submitting your manuscript to Microbiology Spectrum. The reviewers have submitted their comments and recommend "modification". Their comments are attached with this email.

When submitting the revised version of your paper, please provide (1) point-by-point responses to the issues raised by the reviewers as file type "Response to Reviewers," not in your cover letter, and (2) a PDF file that indicates the changes from the original submission (by highlighting or underlining the changes) as file type "Marked Up Manuscript - For Review Only". Please use this link to submit your revised manuscript - we strongly recommend that you submit your paper within the next 60 days or reach out to me. Detailed instructions on submitting your revised paper are below.

Link Not Available

Below you will find instructions from the Microbiology Spectrum editorial office and comments generated during the review.

ASM policy requires that data be available to the public upon online posting of the article, so please verify all links to sequence records, if present, and make sure that each number retrieves the full record of the data. If a new accession number is not linked or a link is broken, provide production staff with the correct URL for the record. If the accession numbers for new data are not publicly accessible before the expected online posting of the article, publication of your article may be delayed; please contact the ASM production staff immediately with the expected release date.

The ASM Journals program strives for constant improvement in our submission and publication process. Please tell us how we can improve your experience by taking this quick [Author Survey](#).

Sincerely,

Luxin Wang

Editor, Microbiology Spectrum

Journals Department  
American Society for Microbiology  
1752 N St., NW  
Washington, DC 20036  
E-mail: [spectrum@asmusa.org](mailto:spectrum@asmusa.org)

Reviewer comments:

Reviewer #3 (Public repository details (Required)):

Tn-seq and RNA-seq data should be deposited in a sequence data archive. Perhaps I have missed it, but I did not see accession numbers in the manuscript.

Reviewer #3 (Comments for the Author):

This is a concise manuscript that studies the lactic acid tolerance response of the foodborne pathogen *Listeria monocytogenes* through transposon mutant library profiling (Tn-seq) and genome-wide gene expression analysis (RNA-seq). While technically correct, the manuscript may need to be improved further as described below:

Major points:

The introduction should be adapted to include more text on our current knowledge of lactic acid tolerance mechanism in *L. monocytogenes* and previous studies that have identified loci in the *Listeria monocytogenes* genome that contribute to this response, e.g. Begley et al., 2003, FEMS Microbiol Lett 218:31-38, Madeo et al., 2012, FEMS Microbiol Lett 326:137-43)

The pH of the medium with the different concentrations of lactic acid should be measured and reported in the manuscript. (L. 94 - 101)

L. 241. Significantly more detail should be provided on how the mutant and the complemented strain were generated. In addition, more detail could be provided to describe how the transposon mutant library was generated and validated (l. 263).

Sequence data needs to be uploaded to a data repository (e.g. the Short Read Archive)

Minor points:

While I had no problems understanding the manuscript, there are some minor grammatical or textual issues throughout which could benefit from corrections.

L. 58: all use of antibiotics will select for resistance, not just abuse.

L. 67-73: it is better to give a specific, relevant examples rather than adding 'etc' as that is not particularly informative.

L. 115 and L. 198 STRING analysis shows whether genes are interacting with each other, not necessarily whether they are related to each other as that suggests they are homologs, which I believe is not what the others mean to say. Have homologs of this gene been characterised in other Gram-positive bacteria (e.g. *Bacillus subtilis*, *Lactobacillus* or *Lactococcus*)?

L. 121 It is confusing that murF is apparently an essential gene, but the authors do identify a transposon mutant in that gene. How can this be explained?

L. 124 Complementary should be complemented

L. 155. This is the first time the abbreviation DEGs is used and it should be explained here.

In the section on the RNA-seq analysis, it should be mentioned whether lmo2248 was significantly up- or down-regulated to connect these analyses with the Tn-seq data presented previously in the manuscript.

Staff Comments:

**Preparing Revision Guidelines**

To submit your modified manuscript, log onto the eJP submission site at <https://spectrum.msubmit.net/cgi-bin/main.plex>. Go to Author Tasks and click the appropriate manuscript title to begin the revision process. The information that you entered when you first submitted the paper will be displayed. Please update the information as necessary. Here are a few examples of required updates that authors must address:

- Point-by-point responses to the issues raised by the reviewers in a file named "Response to Reviewers," NOT IN YOUR COVER LETTER.
- Upload a compare copy of the manuscript (without figures) as a "Marked-Up Manuscript" file.
- Each figure must be uploaded as a separate file, and any multipanel figures must be assembled into one file.
- Manuscript: A .DOC version of the revised manuscript
- Figures: Editable, high-resolution, individual figure files are required at revision, TIFF or EPS files are preferred

For complete guidelines on revision requirements, please see the journal Submission and Review Process requirements at <https://journals.asm.org/journal/Spectrum/submission-review-process>. **Submissions of a paper that does not conform to Microbiology Spectrum guidelines will delay acceptance of your manuscript. "**

Please return the manuscript within 60 days; if you cannot complete the modification within this time period, please contact me. If you do not wish to modify the manuscript and prefer to submit it to another journal, please notify me of your decision

immediately so that the manuscript may be formally withdrawn from consideration by Microbiology Spectrum.

If your manuscript is accepted for publication, you will be contacted separately about payment when the proofs are issued; please follow the instructions in that e-mail. Arrangements for payment must be made before your article is published. For a complete list of **Publication Fees**, including supplemental material costs, please visit our [website](#).

Corresponding authors may [join or renew ASM membership](#) to obtain discounts on publication fees. Need to upgrade your membership level? Please contact Customer Service at [Service@asmusa.org](mailto:Service@asmusa.org).

Thank you for submitting your paper to Microbiology Spectrum.

## Response to reviewers' comments

Dear Prof Luxin Wang,

On behalf of my co-authors, we thank you very much for giving us an opportunity to revise our manuscript, we appreciate editor and reviewers very much for their positive and constructive comments and suggestions on our manuscript entitled "New insights into the lactic acid resistance determinants of *Listeria monocytogenes* based on Tn-seq and RNA-Seq analyses".

We have studied the comments of editor and reviewers carefully and have made revision which marked in red in the revised manuscript. We have tried our best to revise this manuscript according to the comments. Attached please find the revised version, which we would like to submit for your kind consideration. And responses to reviewers' comments are appended below.

We would like to express our great appreciation to you and reviewers for comments on our paper. Looking forward to hearing from you.

Yours sincerely,

Dr. Xinglin Zhang  
College of Agriculture and Forestry  
Linyi University  
Linyi 276000 P.R.China  
Tel: +86-571-86984316  
E-Mail: zhangxinglin@lyu.edu.cn

List of Responses.

**Reviewer #3:** This is a concise manuscript that studies the lactic acid tolerance response of the foodborne pathogen *Listeria monocytogenes* through transposon mutant library profiling (Tn-seq) and genome-wide gene expression analysis (RNA-seq). While technically correct, the manuscript may need to be improved further as described below.

Reply: We thank the reviewer for his/her compliments on our manuscript. Below we will reply in a point-by-point fashion to the reviewer's comments and indicate the alterations we have made to the manuscript.

Major points:

1. Tn-seq and RNA-seq data should be deposited in a sequence data archive. Perhaps I have missed it, but I did not see accession numbers in the manuscript.

Reply: We appreciate for reviewer's advice and we have added the accession numbers in the manuscript (line 359-362). The raw RNA-seq data are available at NCBI Sequence Read Archive (NCBI SRA) under BioProject accession no. PRJNA862260 and the Tn-seq data are available at NCBI SRA under BioProject accession no. PRJNA862615.

2. The introduction should be adapted to include more text on our current knowledge of lactic acid tolerance mechanism in *L. monocytogenes* and previous studies that have identified loci in the *Listeria monocytogenes* genome that contribute to this response, e.g. Begley et al., 2003, FEMS Microbiol Lett 218:31-38, Madeo et al., 2012, FEMS Microbiol Lett 326:137-43)

Reply: We appreciate the suggestion very much. We have made relevant supplements in the Introduction and added more references. (line 77-85)

3. The pH of the medium with the different concentrations of lactic acid should be measured and reported in the manuscript. (L. 94 - 101)

Reply: We appreciate for reviewer's advice and we have supplemented the data with pH values of the medium at different lactic acid concentrations. (line 106-112) (line 277-280)

4. L. 241. Significantly more detail should be provided on how the mutant and the complemented strain were generated. In addition, more detail could be provided to describe how the transposon mutant library was generated and validated (l. 263).

Reply: We appreciate for reviewer's constructive advice and we have added a detailed description of how the mutant strains, complementary strains and mutant libraries are generated and the relevant references were cited. (line 246-255) (line 259-274)

5. Sequence data needs to be uploaded to a data repository (e.g. the Short Read Archive).

Reply: We appreciate for reviewer's suggestion and we have added the accession numbers in the manuscript (line 359-362). The raw RNA-seq data are available at NCBI Sequence Read Archive (NCBI SRA) under BioProject accession no. PRJNA862260 and the Tn-seq data are available at NCBI SRA under BioProject accession no. PRJNA862615.

Minor points:

6. L. 58: all use of antibiotics will select for resistance, not just abuse.

Reply: We thank the reviewer for carefully reading and pointing out the deficiencies of our manuscript. We have revised this section. (line 57-58)

7. L. 67-73: it is better to give a specific, relevant examples rather than adding 'etc' as that is not particularly informative.

Reply: We appreciate for reviewer's advice and we have supplemented relevant examples and specific instructions. (line 63-67, 69-75)

8. L. 115 and L. 198 STRING analysis shows whether genes are interacting with each other, not necessarily whether they are related to each other as that suggests they are homologs, which I believe is not what the others mean to say. Have homologs of this gene been characterised in other Gram-positive bacteria (e.g. *Bacillus subtilis*, *Lactobacillus* or *Lactococcus*)?

Reply: Thanks for the reviewer's constructive remarks. We have removed these inappropriate descriptions in the manuscript. Although we did not find a homologue of *Imo2248* at NCBI, a description of its downstream gene *Imo2249* (encoding a low-affinity inorganic phosphate transporter) was added in the manuscript. (line 204-206).

9. L. 121 It is confusing that *murF* is apparently an essential gene, but the authors do identify a transposon mutant in that gene. How can this be explained?

Reply: The reviewer raises an excellent point. In this study, transposon insertion mutation of *murF* was indeed identified, but due to its low number of reads, it indicates that this mutant strain is also sick and grows slowly, and if it is passed on for more generations it may be competed out and become essential. Because essential genes are indispensable genes for organisms to grow and reproduce offspring under certain environment. However, being essential is highly dependent on the circumstances in which an organism lives.

| Synonym | Total TAs | C1  | C2  | C3  | L1 | L2 | L3 | BHI_count | Gene_size | RefSeq | product                                  | P-value     | FC(BHI/L) | BH       |
|---------|-----------|-----|-----|-----|----|----|----|-----------|-----------|--------|------------------------------------------|-------------|-----------|----------|
| Imo0856 | 68        | 230 | 362 | 163 | 31 | 9  | 17 | 755       | 1374      | murF   | alanyl-D- glutamyl-2,6-diamino pimelate- | 0.035599757 | 13.524201 | 0.006643 |

10. L. 124 Complementary should be complemented.

Reply: We appreciate the reviewer for this suggestion. Following the reviewer's suggestion, we have made changes to it. (line 131)

11. L. 155. This is the first time the abbreviation DEGs is used and it should be explained here.

Reply: We thank the reviewer for pointing this out. We have replaced the DEGs with “differentially expressed genes (DEGs).” (line 157-158)

12. In the section on the RNA-seq analysis, it should be mentioned whether *Imo2248* was significantly up- or down-regulated to connect these analyses with the Tn-seq data presented previously in the manuscript.

Reply: We appreciate the reviewer for the valuable suggestion. We have supplemented the description of changes in *Imo2248* at the transcriptional level in the Results (line 159-160) and Discussion (line 208-210) sections.



November 15, 2022

Prof. Xinglin Zhang  
Linyi University  
linyi  
China

Re: Spectrum02750-22R1 (New insights into the lactic acid resistance determinants of *Listeria monocytogenes* based on Tn-seq and RNA-Seq analyses)

Dear Prof. Xinglin Zhang:

I am pleased to inform you that your manuscript has been accepted, and I am forwarding it to the ASM Journals Department for publication. You will be notified when your proofs are ready to be viewed.

The ASM Journals program strives for constant improvement in our submission and publication process. Please tell us how we can improve your experience by taking this quick [Author Survey](#).

As an open-access publication, Spectrum receives no financial support from paid subscriptions and depends on authors' prompt payment of publication fees as soon as their articles are accepted. You will be contacted separately about payment when the proofs are issued; please follow the instructions in that e-mail. Arrangements for payment must be made before your article is published. For a complete list of **Publication Fees**, including supplemental material costs, please visit our [website](#).

ASM policy requires that data be available to the public upon online posting of the article, so please verify all links to sequence records, if present, and make sure that each number retrieves the full record of the data. If a new accession number is not linked or a link is broken, provide production staff with the correct URL for the record. If the accession numbers for new data are not publicly accessible before the expected online posting of the article, publication of your article may be delayed; please contact the ASM production staff immediately with the expected release date.

Corresponding authors may [join or renew ASM membership](#) to obtain discounts on publication fees. Need to upgrade your membership level? Please contact Customer Service at [Service@asmusa.org](mailto:Service@asmusa.org).

Thank you for submitting your paper to Spectrum.

Sincerely,

Luxin Wang  
Editor, Microbiology Spectrum

Journals Department  
American Society for Microbiology  
1752 N St., NW  
Washington, DC 20036  
E-mail: [spectrum@asmusa.org](mailto:spectrum@asmusa.org)

Supplemental Material: Accept
