# Supplementary material for: New Insights into the Lactic Acid Resistance Determinants of Listeria monocytogenes Based on Transposon Sequencing and Transcriptome Sequencing Analyses
Source: PubMed Central journal article supplement (PMC9927151; doi:10.1128/spectrum.02750-22), 2022-12-21
Supplement: spectrum.02750-22-s0001.pdf [file spectrum.02750-22-s0001.pdf]

## Supplementary material

**Table S1.** Primers used in this study

| Primer               | Sequence                                                        |
|----------------------|-----------------------------------------------------------------|
| pAT392_lox66_genta_F | TACCGTTCGTATAGCATACATTATACGAAGTTATGATAA<br>ACCCAGCGAACCATTTGAGG |
| pAT392_lox71_genta_R | TACCGTTCGTATAATGTATGCTATACGAAGTTATTCAATC<br>TTTATAAGTCCTTTTATAA |
| lmo2248_up_F         | AAGCTGAATTCTGCAGCCCTTGCCCTTCTCTACAGCAC<br>CAG                   |
| lmo2248_up_R         | TGTATGCTATACGAACGGTACTTGAGGTAACGTTCTGA<br>CAGCGTTTCC            |
| lmo2248_down_F       | GCATACATTATACGAACGGTAAGCTACACACCCTCGTC<br>ATCGTACTTGC           |
| lmo2248_down_R       | CTAGAACTAGTGGATCCCCCGGCGATGGAACCAATCA<br>AG                     |
| Check_lmo2248_F      | CGGTAACAGTGGATGCGTTT                                            |
| Check_lmo2248_R      | CGATTGGTCGTGGCTAAGTT                                            |
| Comp_lmo2248_F       | CTCGCATGCGAATTCCTGCAGCAAGTACGATGACGAG<br>GGT                    |
| Comp_lmo2248_R       | ACCACTAGTCCC GGGCTGCAGGAAACGCTGTCAGAAC<br>GTT                   |
